# Supplementary material for: Preparation of conductive microfiltration membrane and its performance in a coupled configuration of membrane bioreactor with microbial fuel cell
Source: Royal Society of Chemistry journal article supplement (doi:10.1039/c7ra01014a), 2017-01-01
Supplement: c7ra01014a1.pdf [file c7ra01014a1.pdf]

## Supporting materials

### Preparation of conductive microfiltration membrane and its performance in a coupled configuration of membrane bioreactor with microbial fuel cell

Lihua Huang<sup>1,2,3,4</sup>, Xiufen Li<sup>1,3,4,\*</sup>, Yueping Ren<sup>1,3,4</sup>, and Xinhua Wang<sup>1,3,4</sup>

<sup>1</sup>Laboratory of Environmental Biotechnology, School of Environmental and Civil Engineering, Jiangnan University, Wuxi 214122, PR China

<sup>2</sup>School of Agriculture and Forestry Science, Linyi University, Linyi 276005, PR China

<sup>3</sup>Jiangsu Key Laboratory of Anaerobic Biotechnology, Wuxi 214122, PR China

<sup>4</sup>Jiangsu Cooperative Innovation Center of Technology and Material of Water Treatment, Suzhou 215009, PR China

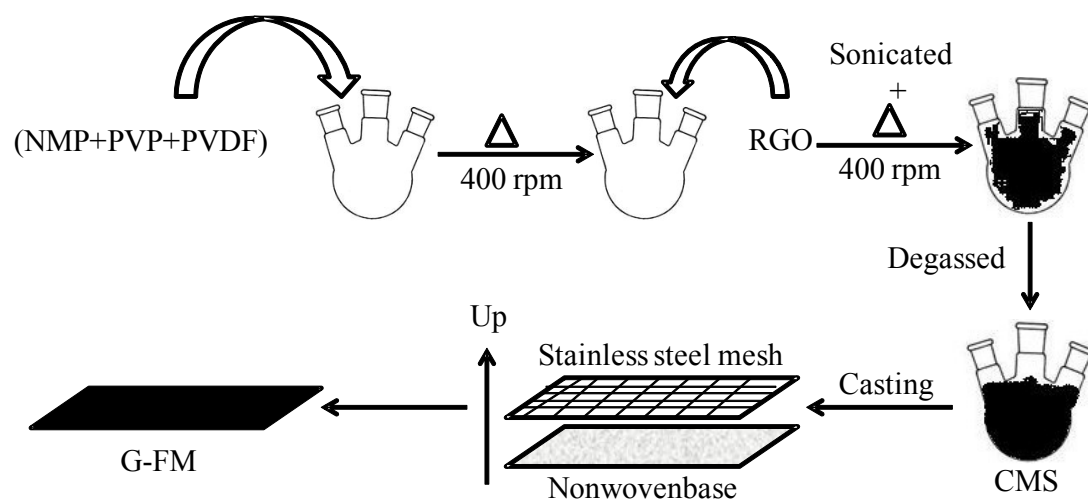

Fig. S1 Sketch map of the preparation for G-FM

\*Address correspondence to Professor Xiufen Li, Laboratory of Environmental Biotechnology, School of Environmental and Civil Engineering, Jiangnan University, Wuxi 214122, China.

E-mail: xfli@jiangnan.edu.cn. Tel.: +86 510 85326516.(X. Li)

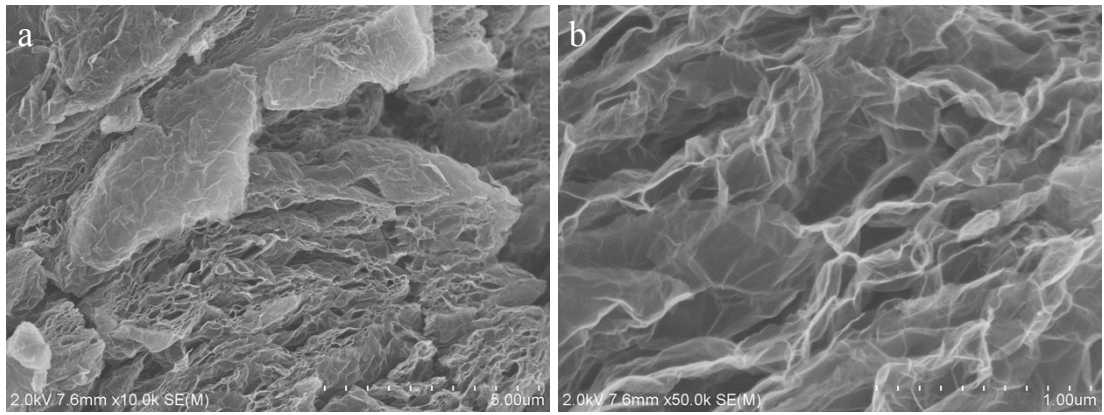

Fig. S2 SEM images of the graphene nanosheets prepared by redox method, (a,  $\times 10,000$ ) and (b,  $\times 50,000$ ).

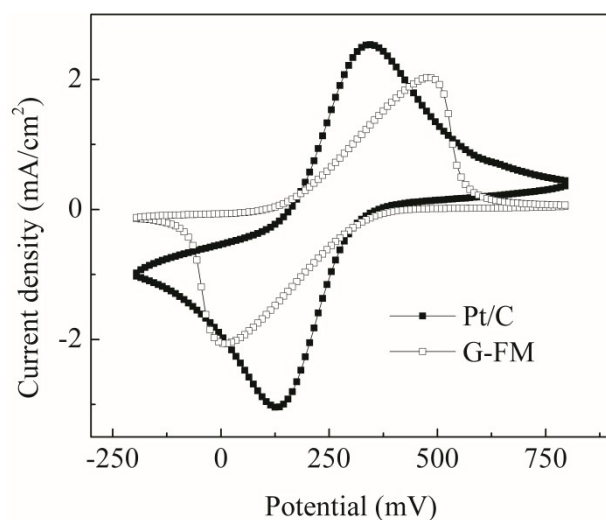

Fig. S3 CV curves of the bare Pt/C and prepared G-FM in 1 mol/L KCl containing 0.05 mol/L  $K_3[Fe(CN)_6]$  at a scanning rate of 5 mV/s.

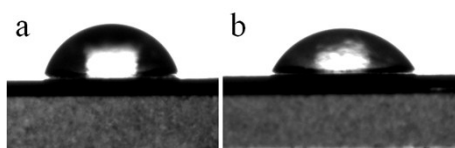

Fig. S4 Contact angles of the commercial FM (a) and prepared G-FM (b).

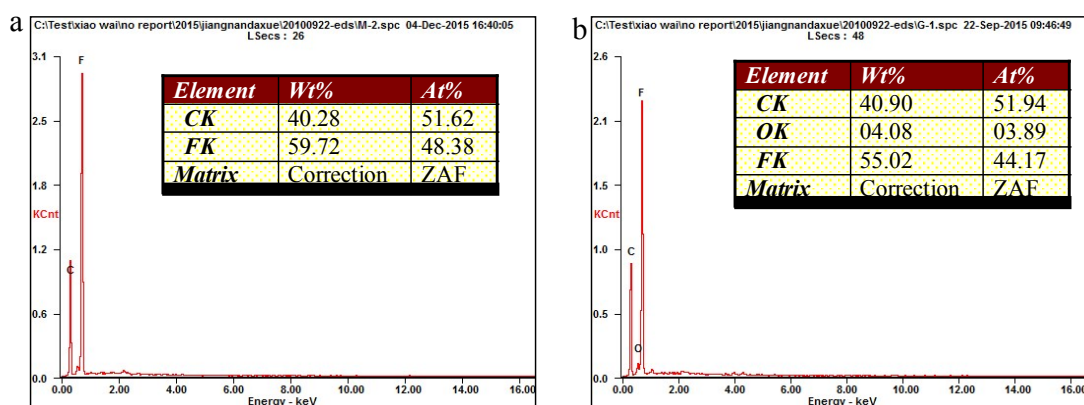

Fig. S5 EDX spectra of the commercial FM (a) and prepared G-FM (b).
